# Supplementary material for: Polyunsaturated fatty acid analogues differentially affect cardiac NaV, CaV, and KV channels through unique mechanisms
Source: eLife. 2020 Mar 24;9:e51453. doi: 10.7554/eLife.51453 (PMC7159882; doi:10.7554/eLife.51453)
Supplement: Figure 4—source data 3. [file elife-51453-fig4-data3.docx]

| **Effects of DHA-taurine on cardiac ion channels** | | | |
| --- | --- | --- | --- |
| **Effects of DHA-taurine at 0.2 μM** | | | |
| Channel Name | I/I0 (0.2 μM) | ΔV0.5 (mV) (0.2 μM) | Gmax/G­max0 (0.2 μM) |
| Kv7.1/KCNE1 | 1.1 ± 0.03 | -1.5 ± 0.4 | 1.1 ± 0.04 |
| Cav1.2 | 0.9 ± 0.04 | 1.7 ± 0.7 | 1.0 ± 0.05 |
| Nav1.5 | 1.0 ± 0.03 | -0.5 ± 0.3 | 1.0 ± 0.01 |
| **Effects of DHA-taurine at 0.7 μM** | | | |
| Channel Name | I/I0 (0.7 μM) | ΔV0.5 (mV) (0.7 μM) | Gmax/G­max0 (0.7 μM) |
| Kv7.1/KCNE1 | 1.4 ± 0.08 | -5.0 ± 1.7 | 1.3 ± 0.1 |
| Cav1.2 | 1.0 ± 0.03 | 1.6 ± 0.8 | 1.1 ± 0.1 |
| Nav1.5 | 1.0 ± 0.03 | -2.6 ± 0.5 | 0.9 ± 0.01 |
| **Effects of DHA-taurine at 2 μM** | | | |
| Channel Name | I/I0 (2 μM) | ΔV0.5 (mV) (2 μM) | Gmax/G­max0 (2 μM) |
| Kv7.1/KCNE1 | 2.9 ± 0.5 | -17.5 ± 2.0 | 1.6 ± 0.2 |
| Cav1.2 | 1.0 ± 0.03 | 1.7 ± 1.0 | 1.1 ± 0.07 |
| Nav1.5 | 0.7 ± 0.04 | -9.4 ± 1.6 | 0.6 ± 0.03 |
| **Effects of DHA-taurine at 7 μM** | | | |
| Channel Name | I/I0 (7 μM) | ΔV0.5 (mV) (7 μM) | Gmax/G­max0 (7 μM) |
| Kv7.1/KCNE1 | 5.1 ± 0.7 | -45.3 ± 2.9 | 1.7 ± 0.1 |
| Cav1.2 | 0.9 ± 0.1 | 0.2 ± 0.8 | 1.1 ± 0.1 |
| Nav1.5 | 0.1 ± 0.01 | -28.5 ± 0.6 | 0.1 ± 0.01 |
| **Effects of DHA-taurine at 20 μM** | | | |
| Channel Name | I/I0 (20 μM) | ΔV0.5 (mV) (20 μM) | Gmax/G­max0 (20 μM) |
| Kv7.1/KCNE1 | 3.1 ± 0.4 | -70.5 ± 6.0 | 1.1 ± 0.9 |
| Cav1.2 | 0.7 ± 0.1 | -3.8 ± 0.9 | 0.8 ± 0.1 |
| Nav1.5 | 0.1 ± 0.03 | -63.2 ± 10.9 | 0.04 ± 0.01 |
| Table containing source data for the application of the PUFA analogue DHA-taurine on the cardiac Kv7.1/KCNE1, Cav1.2, and Nav1.5 channels at every concentration (0.2, 0.7, 2, 7, and 20 μM). Data represented as (mean ± SEM). | | | |
